# Supplementary material
Source: publisher figshare collection journal article supplement (https://asha.figshare.com/articles/dataset/_/5154220)
Supplement: Supplementary file 1 [file 1]

## Supplemental Material S2. Raw scores on language measures by grade group.

**Table S2.1.** Descriptive statistics by grade for language measures used for each language construct, presented in raw score mean (and standard deviation).

| <b>Construct Measure</b>             | <b>Pre-K</b>  | <b>K</b>      | <b>Grade 1</b> | <b>Grade 2</b> | <b>Grade 3</b> | <b>Grade 4</b> | <b>Grade 5</b> |
|--------------------------------------|---------------|---------------|----------------|----------------|----------------|----------------|----------------|
| <i>Receptive Vocabulary</i>          |               |               |                |                |                |                |                |
| CELF-WCR                             | 10.66 (5.03)  | 14.64 (5.22)  | 17.95 (4.17)   | 19.10 (2.70)   | 8.96 (3.38)    | 11.18 (3.69)   | 12.81 (3.78)   |
| ROWPVT                               | 49.49 (15.30) | 65.10 (14.54) | 80.02 (12.58)  | 91.31 (15.64)  | 98.41 (13.17)  | 107.34 (13.13) | 113.47 (14.73) |
| TOLD-PV                              | 14.09 (4.53)  | 17.22 (4.33)  | 20.70 (4.41)   | 23.57 (4.72)   | 40.09 (9.24)   | 44.84 (9.13)   | 48.96 (8.76)   |
| <i>Expressive Vocabulary</i>         |               |               |                |                |                |                |                |
| CELF-EV                              | 13.96 (8.72)  | 21.66 (9.93)  | 30.10 (8.41)   | 36.13 (8.22)   | 40.67 (7.42)   | 44.31 (6.33)   | 45.92 (5.29)   |
| EOWPVT                               | 46.43 (14.72) | 58.61 (15.20) | 73.86 (13.06)  | 84.38 (15.92)  | 92.67 (14.59)  | 101.28 (14.78) | 108.01 (13.34) |
| CELF-WCE                             | 6.11 (5.11)   | 11.22 (5.79)  | 15.67 (4.50)   | 17.27 (3.02)   | 6.65 (3.03)    | 8.33 (3.83)    | 9.85 (3.98)    |
| <i>Depth of Vocabulary Knowledge</i> |               |               |                |                |                |                |                |
| CASL-A                               | 7.83 (5.71)   | 12.57 (5.73)  | 18.12 (4.65)   | 23.22 (4.65)   | 26.18 (4.91)   | 28.81 (5.45)   | 31.17 (5.50)   |
| CELF-WD <sup>a</sup>                 | —             | —             | —              | —              | 12.53 (7.24)   | 16.71 (8.32)   | 18.87 (8.69)   |
| TOLD-RV                              | 5.27 (5.14)   | 9.38 (5.69)   | 15.32 (5.97)   | 19.52 (5.39)   | 12.31 (5.06)   | 14.46 (4.75)   | 15.91 (4.47)   |
| <i>Receptive Syntax/Grammar</i>      |               |               |                |                |                |                |                |
| CASL-G                               | 5.56 (5.42)   | 13.73 (10.38) | 29.08 (12.89)  | 38.46 (13.37)  | 43.18 (13.99)  | 49.41 (13.60)  | 52.21 (4.75)   |
| CELF-SS <sup>b</sup>                 | 14.43 (4.73)  | 19.90 (4.41)  | 23.33 (2.76)   | 24.45 (2.02)   | —              | —              | —              |
| TOLD-MCmp <sup>a</sup>               | —             | —             | —              | —              | 14.76 (9.58)   | 18.88 (9.30)   | 19.42 (9.99)   |
| TOLD-SU <sup>b</sup>                 | 13.31 (6.38)  | 19.37 (5.50)  | 23.31 (3.66)   | 24.68 (2.99)   | —              | —              | —              |
| MSA                                  | 3.79 (5.10)   | 8.29 (14.52)  | 28.77 (25.04)  | 19.68 (9.59)   | 23.21 (6.64)   | 25.07 (5.55)   | 25.53 (5.58)   |

*Expressive Syntax/Grammar*

|                         |              |               |              |               |               |               |              |
|-------------------------|--------------|---------------|--------------|---------------|---------------|---------------|--------------|
| CASL-SC                 | 10.50 (5.72) | 15.96 (6.48)  | 22.40 (6.03) | 27.02 (6.71)  | 29.56 (7.15)  | 34.59 (7.66)  | 37.26 (7.64) |
| CELF-FS                 | 4.07 (5.97)  | 15.93 (11.19) | 27.48 (9.15) | 32.92 (7.47)  | 36.49 (5.70)  | 43.77 (7.23)  | 45.28 (7.32) |
| TOLD-MCmpl <sup>b</sup> | 7.46 (5.78)  | 13.69 (7.17)  | 20.87 (6.25) | 25.46 (6.07)  | —             | —             | —            |
| TOLD-SC <sup>a</sup>    | —            | —             | —            | —             | 11.13 (6.60)  | 13.94 (6.94)  | 15.21 (6.89) |
| SMA                     | 2.48 (2.79)  | 5.02 (4.39)   | 10.06 (8.45) | 19.86 (12.47) | 25.55 (12.37) | 29.88 (10.30) | 31.78 (9.93) |

*Listening Comprehension*

|          |               |               |              |              |              |               |               |
|----------|---------------|---------------|--------------|--------------|--------------|---------------|---------------|
| CELF-CFD | 11.33 (8.05)  | 22.74 (11.16) | 32.66 (9.95) | 39.36 (8.34) | 41.70 (7.70) | 46.93 (5.82)  | 47.54 (5.02)  |
| OWLS-LC  | 28.27 (10.35) | 41.07 (9.51)  | 50.27 (9.93) | 57.21 (9.33) | 61.53 (9.79) | 67.72 (11.03) | 71.94 (10.31) |
| WJ-OC    | 6.00 (3.81)   | 9.51 (4.01)   | 13.38 (3.30) | 15.79 (3.85) | 18.18 (3.87) | 19.98 (3.75)  | 21.66 (3.85)  |

*Note.* CELF = Clinical Evaluation of Language Fundamentals; TOLD = Test of Language Development (Primary or Intermediate version, depending on grade); CASL = Comprehensive Assessment of Spoken Language; CELF-WCR = CELF Word Class Receptive subtest; ROWPVT = Receptive One-Word Picture Vocabulary Test; TOLD-PV = TOLD Picture Vocabulary subtest; CELF-EV = CELF Expressive Vocabulary subtest; EOWPVT = Expressive One-Word Picture Vocabulary Test; CELF-WCE = CELF Word Class Expressive subtest; CASL-A = CASL Antonyms subtest; CELF-WD = CELF Word Definitions subtest; TOLD-RV = TOLD Relational Vocabulary subtest; CASL-G = CASL Grammaticality subtest; CELF-SS = CELF Sentence Structure subtest; TOLD-MComp = TOLD Morphological Comprehension subtest; TOLD-SU = TOLD Syntactic Understanding subtest; MSA = Morphological Syntax Awareness Task; CASL-SC = CASL Syntax Construction subtest; CELF-FS = CELF Formulated Sentences subtest; TOLD-MCmpl = TOLD Morphological Completion subtest; TOLD-SC = TOLD Sentence Combining subtest; SMA = Spoken Morphological Awareness Task; CELF-CFD = CELF Concepts and Following Directions subtest; OWLS-LC = Oral and Written Language Scales Listening Comprehension subtest; WJ-OC = Woodcock–Johnson III Oral Comprehension subtest.

<sup>a</sup>Task only administered at older grades. <sup>b</sup>Task only administered at younger grades.
