# Supplementary material
Source: publisher figshare collection journal article supplement (https://asha.figshare.com/articles/dataset/_/5154220)
Supplement: Supplementary file 5 [file 1]

## Supplemental Material S3. Correlations between age-standardized scores by grade group.

**Table S3.1.** Correlations between age-standardized scores for language measures for preschool sample ( $n = 374$ ).

| Measure        | 1                 | 2      | 3      | 4      | 5      | 6                 | 7      | 8      | 9                 | 10                | 11     | 12     | 13     | 14     | 15     | 16     | 17     | 18     |
|----------------|-------------------|--------|--------|--------|--------|-------------------|--------|--------|-------------------|-------------------|--------|--------|--------|--------|--------|--------|--------|--------|
| 1. EOWPVT      |                   |        |        |        |        |                   |        |        |                   |                   |        |        |        |        |        |        |        |        |
| 2. CELF-EV     | .13*              |        |        |        |        |                   |        |        |                   |                   |        |        |        |        |        |        |        |        |
| 3. CELF-WCE    | .22***            | .49*** |        |        |        |                   |        |        |                   |                   |        |        |        |        |        |        |        |        |
| 4. ROWPVT      | .07 <sup>ns</sup> | .46*** | .41*** |        |        |                   |        |        |                   |                   |        |        |        |        |        |        |        |        |
| 5. CELF-WCR    | .14*              | .48*** | .58*** | .39*** |        |                   |        |        |                   |                   |        |        |        |        |        |        |        |        |
| 6. TOLD-PV     | .13*              | .34*** | .33*** | .41*** | .45*** |                   |        |        |                   |                   |        |        |        |        |        |        |        |        |
| 7. CASL-A      | .28***            | .57*** | .77*** | .46*** | .60*** | .43***            |        |        |                   |                   |        |        |        |        |        |        |        |        |
| 8. TOLD-RV     | .18**             | .45*** | .46*** | .53*** | .44*** | .78***            | .56*** |        |                   |                   |        |        |        |        |        |        |        |        |
| 9. CASL-G      | .07 <sup>ns</sup> | .28*** | .52*** | .31*** | .48*** | .23***            | .50*** | .27*** |                   |                   |        |        |        |        |        |        |        |        |
| 10. CELF-SS    | .13 <sup>ns</sup> | .23*** | .30*** | .18*   | .24*** | .03 <sup>ns</sup> | .28*** | .15*   | .10 <sup>ns</sup> |                   |        |        |        |        |        |        |        |        |
| 11. TOLD-SU    | .26***            | .36*** | .41*** | .39*** | .39*** | .34***            | .44*** | .44*** | .32***            | .29***            |        |        |        |        |        |        |        |        |
| 12. MSA        | .14*              | .40*** | .37*** | .39*** | .44*** | .27***            | .39*** | .35*** | .28***            | .10 <sup>ns</sup> | .52*** |        |        |        |        |        |        |        |
| 13. CASL-SC    | .06 <sup>ns</sup> | .42*** | .45*** | .42*** | .43*** | .30***            | .45*** | .36*** | .29***            | .16*              | .49*** | .57*** |        |        |        |        |        |        |
| 14. CELF-FS    | .18**             | .42*** | .42*** | .31*** | .50*** | .29***            | .48*** | .32*** | .34***            | .20**             | .31*** | .36*** | .41*** |        |        |        |        |        |
| 15. TOLD-MCmpl | .23***            | .46*** | .51*** | .37*** | .55*** | .38***            | .56*** | .48*** | .36***            | .21***            | .38*** | .34*** | .53*** | .48*** |        |        |        |        |
| 16. SMA        | .14*              | .46*** | .62*** | .41*** | .51*** | .32***            | .69*** | .44*** | .39***            | .19***            | .36*** | .33*** | .44*** | .40*** | .49*** |        |        |        |
| 17. OWLS-LC    | .04 <sup>ns</sup> | .35*** | .40*** | .32*** | .46*** | .32***            | .42*** | .35*** | .36***            | .22***            | .40*** | .25*** | .43*** | .29*** | .52*** | .40*** |        |        |
| 18. CELF-CFD   | .20***            | .44*** | .48*** | .33*** | .60*** | .47***            | .61*** | .48*** | .39***            | .20***            | .43*** | .38*** | .49*** | .49*** | .65*** | .51*** | .46*** |        |
| 19. WJ-OC      | .19**             | .49*** | .49*** | .33*** | .53*** | .33***            | .54*** | .45*** | .27***            | .40***            | .48*** | .47*** | .48*** | .45*** | .52*** | .43*** | .38*** | .50*** |

*Note.* CELF = Clinical Evaluation of Language Fundamentals; TOLD = Test of Language Development (Primary version); CASL = Comprehensive Assessment of Spoken Language; EOWPVT = Expressive One-Word Picture Vocabulary Test; CELF-EV = CELF Expressive Vocabulary subtest; CELF-WCE = CELF Word Class Expressive subtest; ROWPVT = Receptive One-Word Picture Vocabulary Test; CELF-WCR = CELF Word Class Receptive subtest; TOLD-PV = TOLD Picture Vocabulary subtest; CASL-A = CASL Antonyms subtest; TOLD-RV = TOLD Relational Vocabulary subtest; CASL-G = CASL Grammaticality subtest; CELF-SS = CELF Sentence Structure subtest; TOLD-SU = TOLD Syntactic Understanding subtest; MSA = Morphological Syntax Awareness Task; CASL-SC = CASL Syntax Construction subtest; CELF-FS = CELF Formulated Sentences subtest; TOLD-MCmpl = TOLD Morphological Completion subtest; SMA = Spoken Morphological Awareness Task; OWLS-LC = Oral and Written Language Scales Listening Comprehension subtest; CELF-CFD = CELF Concepts and Following Directions subtest; WJ-OC = Woodcock-Johnson III Oral Comprehension subtest.

<sup>ns</sup>Not significant. \* $p < .05$ . \*\* $p < .01$ . \*\*\* $p < .001$ .

**Table S3.2.** Correlations between age-standardized scores for language measures for kindergarten sample ( $n = 235$ ).

| Measure        | 1                  | 2                  | 3                  | 4                  | 5                  | 6                  | 7                  | 8                  | 9                  | 10                 | 11                 | 12                 | 13                 | 14                 | 15                 | 16                 | 17                 | 18                 |
|----------------|--------------------|--------------------|--------------------|--------------------|--------------------|--------------------|--------------------|--------------------|--------------------|--------------------|--------------------|--------------------|--------------------|--------------------|--------------------|--------------------|--------------------|--------------------|
| 1. EOWPVT      |                    |                    |                    |                    |                    |                    |                    |                    |                    |                    |                    |                    |                    |                    |                    |                    |                    |                    |
| 2. CELF-EV     | .11 <sup>ns</sup>  |                    |                    |                    |                    |                    |                    |                    |                    |                    |                    |                    |                    |                    |                    |                    |                    |                    |
| 3. CELF-WCE    | .31 <sup>***</sup> | .62 <sup>***</sup> |                    |                    |                    |                    |                    |                    |                    |                    |                    |                    |                    |                    |                    |                    |                    |                    |
| 4. ROWPVT      | .22 <sup>***</sup> | .56 <sup>***</sup> | .60 <sup>***</sup> |                    |                    |                    |                    |                    |                    |                    |                    |                    |                    |                    |                    |                    |                    |                    |
| 5. CELF-WCR    | .16 <sup>*</sup>   | .71 <sup>***</sup> | .70 <sup>***</sup> | .62 <sup>***</sup> |                    |                    |                    |                    |                    |                    |                    |                    |                    |                    |                    |                    |                    |                    |
| 6. TOLD-PV     | .27 <sup>***</sup> | .33 <sup>***</sup> | .43 <sup>***</sup> | .18 <sup>*</sup>   | .34 <sup>***</sup> |                    |                    |                    |                    |                    |                    |                    |                    |                    |                    |                    |                    |                    |
| 7. CASL-A      | .24 <sup>**</sup>  | .68 <sup>***</sup> | .75 <sup>***</sup> | .65 <sup>***</sup> | .70 <sup>***</sup> | .25 <sup>***</sup> |                    |                    |                    |                    |                    |                    |                    |                    |                    |                    |                    |                    |
| 8. TOLD-RV     | .29 <sup>***</sup> | .51 <sup>***</sup> | .58 <sup>***</sup> | .41 <sup>***</sup> | .55 <sup>***</sup> | .85 <sup>***</sup> | .45 <sup>***</sup> |                    |                    |                    |                    |                    |                    |                    |                    |                    |                    |                    |
| 9. CASL-G      | .15 <sup>*</sup>   | .48 <sup>***</sup> | .54 <sup>***</sup> | .44 <sup>***</sup> | .55 <sup>***</sup> | .35 <sup>***</sup> | .56 <sup>***</sup> | .46 <sup>***</sup> |                    |                    |                    |                    |                    |                    |                    |                    |                    |                    |
| 10. CELF-SS    | .22 <sup>**</sup>  | .50 <sup>***</sup> | .55 <sup>***</sup> | .53 <sup>***</sup> | .47 <sup>***</sup> | .30 <sup>***</sup> | .47 <sup>***</sup> | .46 <sup>***</sup> | .40 <sup>***</sup> |                    |                    |                    |                    |                    |                    |                    |                    |                    |
| 11. TOLD-SU    | .28 <sup>***</sup> | .62 <sup>***</sup> | .63 <sup>***</sup> | .59 <sup>***</sup> | .63 <sup>***</sup> | .29 <sup>***</sup> | .53 <sup>***</sup> | .55 <sup>***</sup> | .40 <sup>***</sup> | .62 <sup>***</sup> |                    |                    |                    |                    |                    |                    |                    |                    |
| 12. MSA        | .24 <sup>***</sup> | .51 <sup>***</sup> | .52 <sup>***</sup> | .60 <sup>***</sup> | .54 <sup>***</sup> | .17 <sup>*</sup>   | .57 <sup>***</sup> | .33 <sup>***</sup> | .42 <sup>***</sup> | .45 <sup>***</sup> | .55 <sup>***</sup> |                    |                    |                    |                    |                    |                    |                    |
| 13. CASL-SC    | .30 <sup>***</sup> | .60 <sup>***</sup> | .61 <sup>***</sup> | .52 <sup>***</sup> | .57 <sup>***</sup> | .33 <sup>***</sup> | .65 <sup>***</sup> | .48 <sup>***</sup> | .50 <sup>***</sup> | .45 <sup>***</sup> | .52 <sup>***</sup> | .50 <sup>***</sup> |                    |                    |                    |                    |                    |                    |
| 14. CELF-FS    | .26 <sup>***</sup> | .60 <sup>***</sup> | .59 <sup>***</sup> | .53 <sup>***</sup> | .57 <sup>***</sup> | .39 <sup>***</sup> | .56 <sup>***</sup> | .50 <sup>***</sup> | .45 <sup>***</sup> | .57 <sup>***</sup> | .66 <sup>***</sup> | .51 <sup>***</sup> | .53 <sup>***</sup> |                    |                    |                    |                    |                    |
| 15. TOLD-MCmpl | .15 <sup>*</sup>   | .53 <sup>***</sup> | .59 <sup>***</sup> | .48 <sup>***</sup> | .61 <sup>***</sup> | .35 <sup>***</sup> | .57 <sup>***</sup> | .51 <sup>***</sup> | .45 <sup>***</sup> | .39 <sup>***</sup> | .57 <sup>***</sup> | .49 <sup>***</sup> | .59 <sup>***</sup> | .58 <sup>***</sup> |                    |                    |                    |                    |
| 16. SMA        | .15 <sup>ns</sup>  | .47 <sup>***</sup> | .55 <sup>***</sup> | .41 <sup>***</sup> | .48 <sup>***</sup> | .25 <sup>**</sup>  | .46 <sup>***</sup> | .38 <sup>***</sup> | .29 <sup>***</sup> | .32 <sup>***</sup> | .41 <sup>***</sup> | .39 <sup>***</sup> | .40 <sup>***</sup> | .39 <sup>***</sup> | .41 <sup>***</sup> |                    |                    |                    |
| 17. OWLS-LC    | .12 <sup>ns</sup>  | .53 <sup>***</sup> | .57 <sup>***</sup> | .49 <sup>***</sup> | .64 <sup>***</sup> | .33 <sup>***</sup> | .56 <sup>***</sup> | .57 <sup>***</sup> | .56 <sup>***</sup> | .43 <sup>***</sup> | .57 <sup>***</sup> | .42 <sup>***</sup> | .52 <sup>***</sup> | .49 <sup>***</sup> | .58 <sup>***</sup> | .33 <sup>***</sup> |                    |                    |
| 18. CELF-CFD   | .12 <sup>ns</sup>  | .48 <sup>***</sup> | .45 <sup>***</sup> | .44 <sup>***</sup> | .54 <sup>***</sup> | .21 <sup>*</sup>   | .49 <sup>***</sup> | .37 <sup>***</sup> | .38 <sup>***</sup> | .43 <sup>***</sup> | .48 <sup>***</sup> | .36 <sup>***</sup> | .52 <sup>***</sup> | .40 <sup>***</sup> | .50 <sup>***</sup> | .43 <sup>***</sup> | .45 <sup>***</sup> |                    |
| 19. WJ-OC      | .22 <sup>**</sup>  | .61 <sup>***</sup> | .57 <sup>***</sup> | .51 <sup>***</sup> | .55 <sup>***</sup> | .40 <sup>***</sup> | .60 <sup>***</sup> | .57 <sup>***</sup> | .45 <sup>***</sup> | .44 <sup>***</sup> | .59 <sup>***</sup> | .47 <sup>***</sup> | .54 <sup>***</sup> | .52 <sup>***</sup> | .60 <sup>***</sup> | .39 <sup>***</sup> | .48 <sup>***</sup> | .43 <sup>***</sup> |

*Note.* CELF = Clinical Evaluation of Language Fundamentals; TOLD = Test of Language Development (Primary version); CASL = Comprehensive Assessment of Spoken Language; EOWPVT = Expressive One-Word Picture Vocabulary Test; CELF-EV = CELF Expressive Vocabulary subtest; CELF-WCE = CELF Word Class Expressive subtest; ROWPVT = Receptive One-Word Picture Vocabulary Test; CELF-WCR = CELF Word Class Receptive subtest; TOLD-PV = TOLD Picture Vocabulary subtest; CASL-A = CASL Antonyms subtest; TOLD-RV = TOLD Relational Vocabulary subtest; CASL-G = CASL Grammaticality subtest; CELF-SS = CELF Sentence Structure subtest; TOLD-SU = TOLD Syntactic Understanding subtest; MSA = Morphological Syntax Awareness Task; CASL-SC = CASL Syntax Construction subtest; CELF-FS = CELF Formulated Sentences subtest; TOLD-MCmpl = TOLD Morphological Completion subtest; SMA = Spoken Morphological Awareness Task; OWLS-LC = Oral and Written Language Scales Listening Comprehension subtest; CELF-CFD = CELF Concepts and Following Directions subtest; WJ-OC = Woodcock-Johnson III Oral Comprehension subtest.

<sup>ns</sup>Not significant. \* $p < .05$ . \*\* $p < .01$ . \*\*\* $p < .001$ .

**Table S3.3.** Correlations between age-standardized scores for language measures for first-grade sample ( $n = 301$ ).

| Measure        | 1                 | 2      | 3      | 4      | 5      | 6      | 7      | 8      | 9      | 10     | 11     | 12     | 13     | 14     | 15     | 16     | 17     | 18     |
|----------------|-------------------|--------|--------|--------|--------|--------|--------|--------|--------|--------|--------|--------|--------|--------|--------|--------|--------|--------|
| 1. EOWPVT      |                   |        |        |        |        |        |        |        |        |        |        |        |        |        |        |        |        |        |
| 2. CELF-EV     | .35***            |        |        |        |        |        |        |        |        |        |        |        |        |        |        |        |        |        |
| 3. CELF-WCE    | .37***            | .59*** |        |        |        |        |        |        |        |        |        |        |        |        |        |        |        |        |
| 4. ROWPVT      | .24***            | .49*** | .56*** |        |        |        |        |        |        |        |        |        |        |        |        |        |        |        |
| 5. CELF-WCR    | .33***            | .49*** | .61*** | .47*** |        |        |        |        |        |        |        |        |        |        |        |        |        |        |
| 6. TOLD-PV     | .04 <sup>ns</sup> | .28*** | .31*** | .30*** | .25*** |        |        |        |        |        |        |        |        |        |        |        |        |        |
| 7. CASL-A      | .34***            | .59*** | .73*** | .57*** | .67*** | .28*** |        |        |        |        |        |        |        |        |        |        |        |        |
| 8. TOLD-RV     | .16*              | .35*** | .44*** | .36*** | .38*** | .89*** | .38*** |        |        |        |        |        |        |        |        |        |        |        |
| 9. CASL-G      | .36***            | .45*** | .60*** | .51*** | .52*** | .17*   | .55*** | .23**  |        |        |        |        |        |        |        |        |        |        |
| 10. CELF-SS    | .29***            | .63*** | .43*** | .48*** | .48*** | .32*** | .49*** | .37*** | .42*** |        |        |        |        |        |        |        |        |        |
| 11. TOLD-SU    | .26***            | .45*** | .50*** | .39*** | .44*** | .39*** | .47*** | .47*** | .41*** | .51*** |        |        |        |        |        |        |        |        |
| 12. MSA        | .24***            | .48*** | .47*** | .40*** | .47*** | .24*** | .51*** | .32*** | .34*** | .58*** | .44*** |        |        |        |        |        |        |        |
| 13. CASL-SC    | .28***            | .56*** | .54*** | .60*** | .58*** | .33*** | .55*** | .39*** | .45*** | .60*** | .52*** | .48*** |        |        |        |        |        |        |
| 14. CELF-FS    | .25***            | .52*** | .48*** | .49*** | .47*** | .33*** | .45*** | .44*** | .36*** | .61*** | .48*** | .56*** | .54*** |        |        |        |        |        |
| 15. TOLD-MCmpl | .18***            | .39*** | .42*** | .35*** | .45*** | .22**  | .43*** | .29*** | .30*** | .39*** | .41*** | .32*** | .45*** | .45*** |        |        |        |        |
| 16. SMA        | .18**             | .37*** | .40*** | .21**  | .41*** | .12**  | .45*** | .19*** | .24*** | .22*** | .36*** | .27*** | .27*** | .27*** | .25*** |        |        |        |
| 17. OWLS-LC    | .30***            | .52*** | .52*** | .53*** | .53*** | .34*** | .53*** | .38*** | .43*** | .48*** | .36*** | .39*** | .55*** | .45*** | .45*** | .24*** |        |        |
| 18. CELF-CFD   | .23***            | .50*** | .42*** | .33*** | .46*** | .27*** | .48*** | .31*** | .40*** | .45*** | .41*** | .49*** | .49*** | .40*** | .31*** | .22*** | .47*** |        |
| 19. WJ-OC      | .26***            | .50*** | .50*** | .48*** | .45*** | .32*** | .55*** | .38*** | .39*** | .53*** | .54*** | .49*** | .57*** | .52*** | .41*** | .25*** | .48*** | .40*** |

*Note.* CELF = Clinical Evaluation of Language Fundamentals; TOLD = Test of Language Development (Primary version); CASL = Comprehensive Assessment of Spoken Language; EOWPVT = Expressive One-Word Picture Vocabulary Test; CELF-EV = CELF Expressive Vocabulary subtest; CELF-WCE = CELF Word Class Expressive subtest; ROWPVT = Receptive One-Word Picture Vocabulary Test; CELF-WCR = CELF Word Class Receptive subtest; TOLD-PV = TOLD Picture Vocabulary subtest; CASL-A = CASL Antonyms subtest; TOLD-RV = TOLD Relational Vocabulary subtest; CASL-G = CASL Grammaticality subtest; CELF-SS = CELF Sentence Structure subtest; TOLD-SU = TOLD Syntactic Understanding subtest; MSA = Morphological Syntax Awareness Task; CASL-SC = CASL Syntax Construction subtest; CELF-FS = CELF Formulated Sentences subtest; TOLD-MCmpl = TOLD Morphological Completion subtest; SMA = Spoken Morphological Awareness Task; OWLS-LC = Oral and Written Language Scales Listening Comprehension subtest; CELF-CFD = CELF Concepts and Following Directions subtest; WJ-OC = Woodcock-Johnson III Oral Comprehension subtest.

<sup>ns</sup>Not significant. \* $p < .05$ . \*\* $p < .01$ . \*\*\* $p < .001$ .

**Table S3.4.** Correlations between age-standardized scores for language measures for second-grade sample ( $n = 227$ ).

| Measure        | 1      | 2                 | 3      | 4      | 5      | 6                 | 7      | 8                 | 9      | 10     | 11     | 12     | 13     | 14     | 15     | 16     | 17     | 18     |
|----------------|--------|-------------------|--------|--------|--------|-------------------|--------|-------------------|--------|--------|--------|--------|--------|--------|--------|--------|--------|--------|
| 1. EOWPVT      |        |                   |        |        |        |                   |        |                   |        |        |        |        |        |        |        |        |        |        |
| 2. CELF-EV     | .45*** |                   |        |        |        |                   |        |                   |        |        |        |        |        |        |        |        |        |        |
| 3. CELF-WCE    | .43*** | .69***            |        |        |        |                   |        |                   |        |        |        |        |        |        |        |        |        |        |
| 4. ROWPVT      | .48*** | .59***            | .47*** |        |        |                   |        |                   |        |        |        |        |        |        |        |        |        |        |
| 5. CELF-WCR    | .38*** | .50***            | .55*** | .36*** |        |                   |        |                   |        |        |        |        |        |        |        |        |        |        |
| 6. TOLD-PV     | .17*   | .13 <sup>ns</sup> | .20*   | .24*** | .16*** |                   |        |                   |        |        |        |        |        |        |        |        |        |        |
| 7. CASL-A      | .54*** | .66***            | .77*** | .55*** | .58*** | .25***            |        |                   |        |        |        |        |        |        |        |        |        |        |
| 8. TOLD-RV     | .21**  | .24***            | .35*** | .31*** | .28*** | .85***            | .36*** |                   |        |        |        |        |        |        |        |        |        |        |
| 9. CASL-G      | .35*** | .52***            | .54*** | .49*** | .49*** | .21*              | .54*** | .27***            |        |        |        |        |        |        |        |        |        |        |
| 10. CELF-SS    | .44*** | .64***            | .62*** | .54*** | .51*** | .19**             | .59*** | .32***            | .50*** |        |        |        |        |        |        |        |        |        |
| 11. TOLD-SU    | .32*** | .48***            | .46*** | .45*** | .27*** | .16 <sup>ns</sup> | .41*** | .21*              | .33*** | .56*** |        |        |        |        |        |        |        |        |
| 12. MSA        | .46*** | .58***            | .65*** | .50*** | .40*** | .21**             | .60*** | .34***            | .43*** | .61*** | .48*** |        |        |        |        |        |        |        |
| 13. CASL-SC    | .36*** | .52***            | .56*** | .57*** | .27*   | .14**             | .57*** | .27***            | .42*** | .58*** | .48*** | .59*** |        |        |        |        |        |        |
| 14. CELF-FS    | .50*** | .61***            | .60*** | .59*** | .47*** | .15*              | .60*** | .30***            | .51*** | .63*** | .51*** | .62*** | .51*** |        |        |        |        |        |
| 15. TOLD-MCmpl | .14**  | .38***            | .38*** | .37*** | .27*** | .00 <sup>ns</sup> | .36*** | .08 <sup>ns</sup> | .30*** | .33*** | .37*** | .33*** | .40*** | .39*** |        |        |        |        |
| 16. SMA        | .42*** | .38***            | .47*** | .28*** | .29*** | .12*              | .42*** | .18***            | .27**  | .34*** | .29*** | .26**  | .34*** | .35*** | .11*   |        |        |        |
| 17. OWLS-LC    | .28*** | .44***            | .40*** | .41*** | .36*** | .10 <sup>ns</sup> | .41*** | .20***            | .43*** | .53*** | .36*** | .37*** | .49*** | .49*** | .49*** | .20**  |        |        |
| 18. CELF-CFD   | .37*** | .49***            | .43*** | .38*** | .41*** | .08 <sup>ns</sup> | .53*** | .16 <sup>ns</sup> | .29**  | .38*** | .36*** | .48*** | .37*** | .50*** | .46*** | .30*** | .40*** |        |
| 19. WJ-OC      | .25*** | .51***            | .46*** | .45*** | .36*** | .14 <sup>ns</sup> | .44*** | .29***            | .36*** | .59*** | .51*** | .47*** | .51*** | .53*** | .51*** | .18*   | .47*** | .35*** |

*Note.* CELF = Clinical Evaluation of Language Fundamentals; TOLD = Test of Language Development (Primary version); CASL = Comprehensive Assessment of Spoken Language; EOWPVT = Expressive One-Word Picture Vocabulary Test; CELF-EV = CELF Expressive Vocabulary subtest; CELF-WCE = CELF Word Class Expressive subtest; ROWPVT = Receptive One-Word Picture Vocabulary Test; CELF-WCR = CELF Word Class Receptive subtest; TOLD-PV = TOLD Picture Vocabulary subtest; CASL-A = CASL Antonyms subtest; TOLD-RV = TOLD Relational Vocabulary subtest; CASL-G = CASL Grammaticality subtest; CELF-SS = CELF Sentence Structure subtest; TOLD-SU = TOLD Syntactic Understanding subtest; MSA = Morphological Syntax Awareness Task; CASL-SC = CASL Syntax Construction subtest; CELF-FS = CELF Formulated Sentences subtest; TOLD-MCmpl = TOLD Completion subtest; SMA = Spoken Morphological Awareness Task; OWLS-LC = Oral and Written Language Scales Listening Comprehension subtest; CELF-CFD = CELF Concepts and Following Directions subtest; WJ-OC = Woodcock-Johnson III Oral Comprehension subtest.

<sup>ns</sup>Not significant. \* $p < .05$ . \*\* $p < .01$ . \*\*\* $p < .001$ .

**Table S3.5.** Correlations between age-standardized scores for language measures for third-grade sample ( $n = 290$ ).

| Measure        | 1      | 2      | 3      | 4      | 5      | 6      | 7      | 8      | 9      | 10     | 11     | 12     | 13     | 14     | 15     | 16     | 17     | 18     | 19     |
|----------------|--------|--------|--------|--------|--------|--------|--------|--------|--------|--------|--------|--------|--------|--------|--------|--------|--------|--------|--------|
| 1. EOWPVT      |        |        |        |        |        |        |        |        |        |        |        |        |        |        |        |        |        |        |        |
| 2. CELF-EV     | .54*** |        |        |        |        |        |        |        |        |        |        |        |        |        |        |        |        |        |        |
| 3. CELF-WCE    | .42*** | .60*** |        |        |        |        |        |        |        |        |        |        |        |        |        |        |        |        |        |
| 4. ROWPVT      | .51*** | .66*** | .57*** |        |        |        |        |        |        |        |        |        |        |        |        |        |        |        |        |
| 5. CELF-WCR    | .53*** | .60*** | .63*** | .60*** |        |        |        |        |        |        |        |        |        |        |        |        |        |        |        |
| 6. TOLD-PV     | .45*** | .55*** | .52*** | .59*** | .57*** |        |        |        |        |        |        |        |        |        |        |        |        |        |        |
| 7. CASL-A      | .43*** | .58*** | .70*** | .61*** | .63*** | .61*** |        |        |        |        |        |        |        |        |        |        |        |        |        |
| 8. TOLD-RV     | .51*** | .57*** | .45*** | .66*** | .51*** | .83*** | .54*** |        |        |        |        |        |        |        |        |        |        |        |        |
| 9. CELF-WD     | .37*** | .59*** | .59*** | .49*** | .54*** | .57*** | .64*** | .49*** |        |        |        |        |        |        |        |        |        |        |        |
| 10. CASL-G     | .48*** | .62*** | .60*** | .57*** | .66*** | .61*** | .65*** | .55*** | .63*** |        |        |        |        |        |        |        |        |        |        |
| 11. CELF-SS    | .45*** | .53*** | .58*** | .50*** | .56*** | .50*** | .57*** | .46*** | .52*** | .61*** |        |        |        |        |        |        |        |        |        |
| 12. MSA        | .35*** | .47*** | .39*** | .45*** | .41*** | .36*** | .46*** | .38*** | .49*** | .45*** | .59*** |        |        |        |        |        |        |        |        |
| 13. TOLD-MComp | .24*** | .40*** | .36*** | .24*** | .41*** | .35*** | .35*** | .23*** | .38*** | .43*** | .45*** | .44*** |        |        |        |        |        |        |        |
| 14. CASL-SC    | .35*** | .49*** | .40*** | .39*** | .43*** | .38*** | .38*** | .37*** | .52*** | .51*** | .60*** | .37*** | .24*** |        |        |        |        |        |        |
| 15. CELF-FS    | .45*** | .57*** | .56*** | .53*** | .57*** | .55*** | .60*** | .52*** | .46*** | .62*** | .61*** | .48*** | .48*** | .40*** |        |        |        |        |        |
| 16. TOLD-SC    | .24*** | .39*** | .35*** | .35*** | .35*** | .28*** | .39*** | .32*** | .29*** | .41*** | .49*** | .37*** | .29*** | .24*** | .51*** |        |        |        |        |
| 17. SMA        | .33*** | .45*** | .50*** | .45*** | .51*** | .41*** | .50*** | .33*** | .41*** | .48*** | .38*** | .36*** | .22*** | .34*** | .45*** | .30*** |        |        |        |
| 18. OWLS-LC    | .28*** | .47*** | .37*** | .36*** | .43*** | .49*** | .45*** | .39*** | .49*** | .45*** | .49*** | .49*** | .28*** | .42*** | .40*** | .24*** | .32*** |        |        |
| 19. CELF-CFD   | .39*** | .45*** | .57*** | .44*** | .58*** | .45*** | .56*** | .38*** | .46*** | .58*** | .52*** | .41*** | .38*** | .38*** | .49*** | .28*** | .36*** | .46*** |        |
| 20. WJ-OC      | .32*** | .47*** | .46*** | .32*** | .47*** | .34*** | .43*** | .35*** | .37*** | .45*** | .49*** | .40*** | .39*** | .30*** | .52*** | .41*** | .22*** | .33*** | .46*** |

*Note.* CELF = Clinical Evaluation of Language Fundamentals; TOLD = Test of Language Development (Intermediate version); CASL = Comprehensive Assessment of Spoken Language; EOWPVT = Expressive One-Word Picture Vocabulary Test; CELF-EV = CELF Expressive Vocabulary subtest; CELF-WCE = CELF Word Class Expressive subtest; ROWPVT = Receptive One-Word Picture Vocabulary Test; CELF-WCR = CELF Word Class Receptive subtest; TOLD-PV = TOLD Picture Vocabulary subtest; CASL-A = CASL Antonyms subtest; TOLD-RV = TOLD Relational Vocabulary subtest; CELF-WD = CELF Word Definitions subtest; CASL-G = CASL Grammaticality subtest; CELF-SS = CELF Sentence Structure subtest; MSA = Morphological Syntax Awareness Task; TOLD-MComp = TOLD Morphological Comprehension subtest; CASL-SC = CASL Syntax Construction subtest; CELF-FS = CELF Formulated Sentences subtest; TOLD-SC = TOLD Sentence Combining subtest; SMA = Spoken Morphological Awareness Task; OWLS-LC = Oral and Written Language Scales Listening Comprehension subtest; CELF-CFD = CELF Concepts and Following Directions subtest; WJ-OC = Woodcock-Johnson III Oral Comprehension subtest.

<sup>ns</sup>Not significant. \*  $p < .05$ . \*\*  $p < .01$ . \*\*\*  $p < .001$ .

**Table S3.6.** Correlations between age-standardized scores for language measures for fourth-grade sample ( $n = 229$ ).

| Measure        | 1      | 2      | 3      | 4      | 5      | 6      | 7      | 8      | 9      | 10     | 11     | 12     | 13     | 14     | 15     | 16     | 17     | 18     | 19     |
|----------------|--------|--------|--------|--------|--------|--------|--------|--------|--------|--------|--------|--------|--------|--------|--------|--------|--------|--------|--------|
| 1. EOWPVT      |        |        |        |        |        |        |        |        |        |        |        |        |        |        |        |        |        |        |        |
| 2. CELF-EV     | .53*** |        |        |        |        |        |        |        |        |        |        |        |        |        |        |        |        |        |        |
| 3. CELF-WCE    | .49*** | .58*** |        |        |        |        |        |        |        |        |        |        |        |        |        |        |        |        |        |
| 4. ROWPVT      | .47*** | .66*** | .49*** |        |        |        |        |        |        |        |        |        |        |        |        |        |        |        |        |
| 5. CELF-WCR    | .47*** | .65*** | .59*** | .54*** |        |        |        |        |        |        |        |        |        |        |        |        |        |        |        |
| 6. TOLD-PV     | .54*** | .62*** | .45*** | .57*** | .53*** |        |        |        |        |        |        |        |        |        |        |        |        |        |        |
| 7. CASL-A      | .53*** | .67*** | .69*** | .54*** | .66*** | .56*** |        |        |        |        |        |        |        |        |        |        |        |        |        |
| 8. TOLD-RV     | .57*** | .58*** | .43*** | .60*** | .46*** | .81*** | .52*** |        |        |        |        |        |        |        |        |        |        |        |        |
| 9. CELF-WD     | .52*** | .59*** | .59*** | .47*** | .56*** | .51*** | .70*** | .41*** |        |        |        |        |        |        |        |        |        |        |        |
| 10. CASL-G     | .49*** | .67*** | .52*** | .54*** | .70*** | .51*** | .69*** | .48*** | .65*** |        |        |        |        |        |        |        |        |        |        |
| 11. CELF-SS    | .47*** | .59*** | .56*** | .44*** | .49*** | .46*** | .52*** | .45*** | .40*** | .49*** |        |        |        |        |        |        |        |        |        |
| 12. MSA        | .41*** | .45*** | .46*** | .35*** | .34*** | .26*** | .39*** | .34*** | .35*** | .45*** | .56*** |        |        |        |        |        |        |        |        |
| 13. TOLD-MComp | .27*** | .28*** | .35*** | .21*** | .37*** | .20**  | .33*** | .17*   | .37*** | .33*** | .29*** | .25**  |        |        |        |        |        |        |        |
| 14. CASL-SC    | .51*** | .48*** | .46*** | .43*** | .38*** | .40*** | .50*** | .46*** | .41*** | .42*** | .66*** | .40*** | .25*** |        |        |        |        |        |        |
| 15. CELF-FS    | .50*** | .66*** | .54*** | .52*** | .59*** | .53*** | .56*** | .51*** | .50*** | .57*** | .67*** | .51*** | .28*** | .45*** |        |        |        |        |        |
| 16. TOLD-SC    | .39*** | .47*** | .47*** | .53*** | .52*** | .48*** | .42*** | .47*** | .40*** | .46*** | .51*** | .41*** | .50*** | .24**  | .53*** |        |        |        |        |
| 17. SMA        | .44*** | .49*** | .58*** | .43*** | .50*** | .37*** | .54*** | .38*** | .54*** | .61*** | .43*** | .34*** | .23**  | .40*** | .55*** | .42*** |        |        |        |
| 18. OWLS-LC    | .41*** | .48*** | .41*** | .36*** | .48*** | .40*** | .47*** | .34*** | .49*** | .41*** | .47*** | .36*** | .25*** | .42*** | .54*** | .35*** | .39*** |        |        |
| 19. CELF-CFD   | .38*** | .51*** | .37*** | .38*** | .44*** | .42*** | .53*** | .35*** | .57*** | .51*** | .44*** | .31*** | .29**  | .35*** | .56*** | .43*** | .41*** | .43*** |        |
| 20. WJ-OC      | .37*** | .46*** | .42*** | .40*** | .45*** | .43*** | .43*** | .43*** | .32*** | .39*** | .44*** | .31*** | .19*   | .43*** | .49*** | .48*** | .32*** | .35*** | .37*** |

*Note.* CELF = Clinical Evaluation of Language Fundamentals; TOLD = Test of Language Development (Intermediate version); CASL = Comprehensive Assessment of Spoken Language; EOWPVT = Expressive One-Word Picture Vocabulary Test; CELF-EV = CELF Expressive Vocabulary subtest; CELF-WCE = CELF Word Class Expressive subtest; ROWPVT = Receptive One-Word Picture Vocabulary Test; CELF-WCR = CELF Word Class Receptive subtest; TOLD-PV = TOLD Picture Vocabulary subtest; CASL-A = CASL Antonyms subtest; TOLD-RV = TOLD Relational Vocabulary subtest; CELF-WD = CELF Word Definitions subtest; CASL-G = CASL Grammaticality subtest; CELF-SS = CELF Sentence Structure subtest; MSA = Morphological Syntax Awareness Task; TOLD-MComp = TOLD Morphological Comprehension subtest; CASL-SC = CASL Syntax Construction subtest; CELF-FS = CELF Formulated Sentences subtest; TOLD-SC = TOLD Sentence Combining subtest; SMA = Spoken Morphological Awareness Task; OWLS-LC = Oral and Written Language Scales Listening Comprehension subtest; CELF-CFD = CELF Concepts and Following Directions subtest; WJ-OC = Woodcock–Johnson III Oral Comprehension subtest.

<sup>ns</sup>Not significant. \*  $p < .05$ . \*\*  $p < .01$ . \*\*\*  $p < .001$ .

**Table S3.7.** Correlations between age-standardized scores for language measures for fifth-grade sample ( $n = 234$ ).

| Measure        | 1      | 2      | 3      | 4      | 5      | 6                 | 7      | 8      | 9      | 10     | 11     | 12     | 13                | 14     | 15     | 16     | 17    | 18     | 19     |
|----------------|--------|--------|--------|--------|--------|-------------------|--------|--------|--------|--------|--------|--------|-------------------|--------|--------|--------|-------|--------|--------|
| 1. EOWPVT      |        |        |        |        |        |                   |        |        |        |        |        |        |                   |        |        |        |       |        |        |
| 2. CELF-EV     | .48*** |        |        |        |        |                   |        |        |        |        |        |        |                   |        |        |        |       |        |        |
| 3. CELF-WCE    | .46*** | .57*** |        |        |        |                   |        |        |        |        |        |        |                   |        |        |        |       |        |        |
| 4. ROWPVT      | .53*** | .67*** | .50*** |        |        |                   |        |        |        |        |        |        |                   |        |        |        |       |        |        |
| 5. CELF-WCR    | .44*** | .58*** | .50*** | .54*** |        |                   |        |        |        |        |        |        |                   |        |        |        |       |        |        |
| 6. TOLD-PV     | .43*** | .54*** | .38*** | .66*** | .48*** |                   |        |        |        |        |        |        |                   |        |        |        |       |        |        |
| 7. CASL-A      | .53*** | .66*** | .67*** | .57*** | .63*** | .48***            |        |        |        |        |        |        |                   |        |        |        |       |        |        |
| 8. TOLD-RV     | .43*** | .54*** | .42*** | .68*** | .47*** | .83***            | .47*** |        |        |        |        |        |                   |        |        |        |       |        |        |
| 9. CELF-WD     | .42*** | .57*** | .44*** | .58*** | .44*** | .48***            | .58*** | .47*** |        |        |        |        |                   |        |        |        |       |        |        |
| 10. CASL-G     | .51*** | .57*** | .46*** | .57*** | .66*** | .48***            | .67*** | .46*** | .53*** |        |        |        |                   |        |        |        |       |        |        |
| 11. CELF-SS    | .51*** | .63*** | .53*** | .58*** | .49*** | .57***            | .58*** | .57*** | .55*** | .56*** |        |        |                   |        |        |        |       |        |        |
| 12. MSA        | .35*** | .43*** | .44*** | .37*** | .41*** | .39***            | .47*** | .34*** | .38*** | .44*** | .51*** |        |                   |        |        |        |       |        |        |
| 13. TOLD-MComp | .27*** | .33*** | .27*** | .30*** | .35*** | .14 <sup>ns</sup> | .21**  | .26**  | .14*   | .27*** | .36*** | .34*** |                   |        |        |        |       |        |        |
| 14. CASL-SC    | .43*** | .47*** | .38*** | .47*** | .41*** | .44***            | .46*** | .44*** | .47*** | .47*** | .65*** | .39*** | .23***            |        |        |        |       |        |        |
| 15. CELF-FS    | .46*** | .57*** | .41*** | .56*** | .40*** | .50***            | .49*** | .55*** | .40*** | .44*** | .67*** | .43*** | .48***            | .41*** |        |        |       |        |        |
| 16. TOLD-SC    | .33*** | .48*** | .40*** | .45*** | .43*** | .47***            | .47*** | .46*** | .39*** | .45*** | .60*** | .43*** | .51***            | .33*** | .52*** |        |       |        |        |
| 17. SMA        | .43*** | .36*** | .41*** | .48*** | .40*** | .34***            | .45*** | .37*** | .23*** | .42*** | .40*** | .21*** | .05 <sup>ns</sup> | .37*** | .30*** | .22*** |       |        |        |
| 18. OWLS-LC    | .35*** | .37*** | .25*** | .28*** | .34*** | .28***            | .28*** | .29*** | .43*** | .28*** | .32*** | .35*** | .21***            | .29*** | .31*** | .34*** | .23** |        |        |
| 19. CELF-CFD   | .33*** | .48*** | .35*** | .44*** | .35*** | .42***            | .42*** | .40*** | .21**  | .40*** | .48*** | .42*** | .35***            | .19*   | .50*** | .44*** | .23** | .22**  |        |
| 20. WJ-OC      | .28*** | .40*** | .31*** | .30*** | .33*** | .40***            | .32*** | .42*** | .22**  | .29*** | .50*** | .37*** | .26*              | .23**  | .44*** | .51*** | .18** | .22*** | .35*** |

*Note.* CELF = Clinical Evaluation of Language Fundamentals; TOLD = Test of Language Development (Intermediate version); CASL = Comprehensive Assessment of Spoken Language; EOWPVT = Expressive One-Word Picture Vocabulary Test; CELF-EV = CELF Expressive Vocabulary subtest; CELF-WCE = CELF Word Class Expressive subtest; ROWPVT = Receptive One-Word Picture Vocabulary Test; CELF-WCR = CELF Word Class Receptive subtest; TOLD-PV = TOLD Picture Vocabulary subtest; CASL-A = CASL Antonyms subtest; TOLD-RV = TOLD Relational Vocabulary subtest; CELF-WD = CELF Word Definitions subtest; CASL-G = CASL Grammaticality subtest; CELF-SS = CELF Sentence Structure subtest; MSA = Morphological Syntax Awareness Task; TOLD-MComp = TOLD Morphological Comprehension subtest; CASL-SC = CASL Syntax Construction subtest; CELF-FS = CELF Formulated Sentences subtest; TOLD-SC = TOLD Sentence Combining subtest; SMA = Spoken Morphological Awareness Task; OWLS-LC = Oral and Written Language Scales Listening Comprehension subtest; CELF-CFD = CELF Concepts and Following Directions subtest; WJ-OC = Woodcock-Johnson III Oral Comprehension subtest.

<sup>ns</sup>Not significant. \* $p < .05$ . \*\* $p < .01$ . \*\*\* $p < .001$ .
